# Supplementary material for: Productive mRNA Chromatin Escape is Promoted by PRMT5 Methylation of SNRPB
Source: PubMed Central journal article supplement — bioRxiv. 2024 Aug 12:2024.08.09.607355. Preprint. [Version 2] doi: 10.1101/2024.08.09.607355 (PMC11326253; doi:10.1101/2024.08.09.607355), 2024-08-12
Supplement: media-1.pdf [file media-1.pdf]

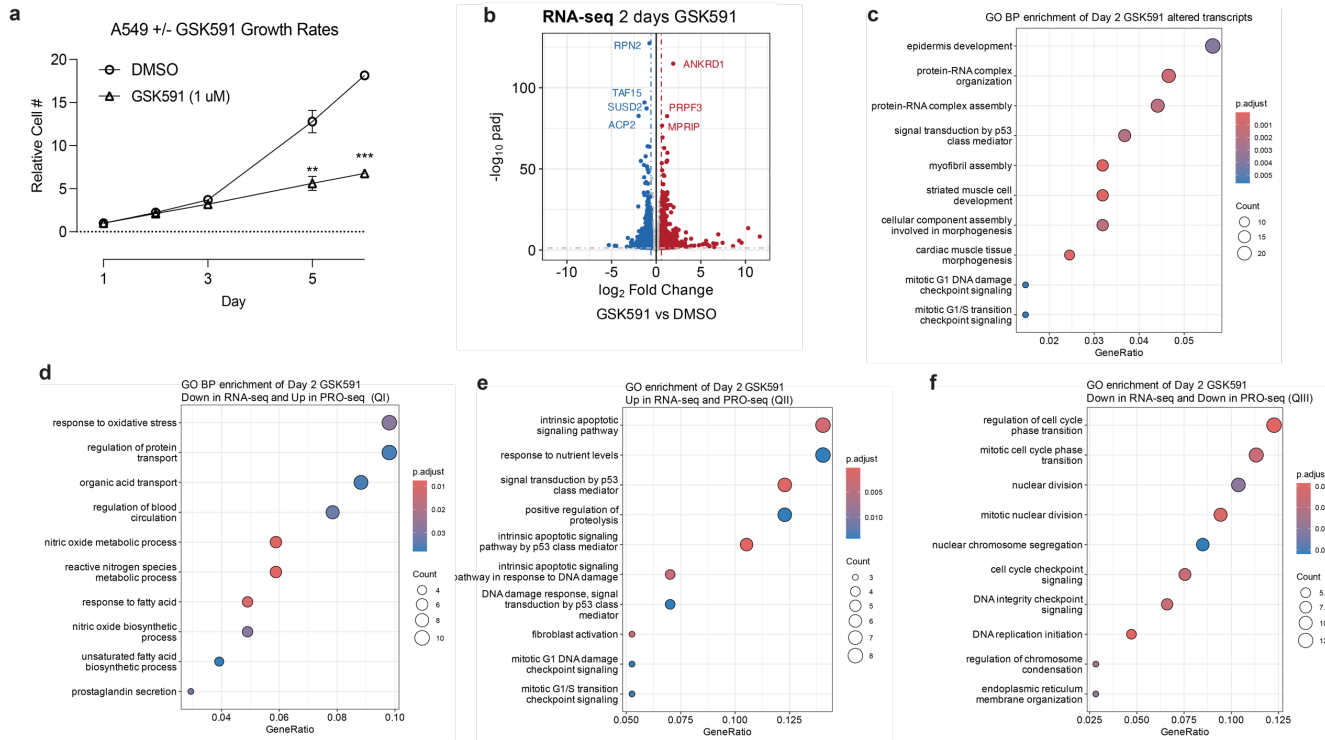

**Supplemental Figure S1 (Related to Figure 1). Additional PRMT5 inhibition characterization. a)** Growth curve of GSK591 treatment on A549 cells; \*\* $<0.01$ , \*\*\* $<0.0001$ . **b)** Volcano plot of poly(A) RNA-sequencing following two days of GSK591 treatment, compared to DMSO control. **c)** Dot plot of GO Biological Processes (BP) terms for total mRNA sequencing of GSK591 treatment. **d-f)** Dot plots of GO Biological Processes (BP) terms for quadrants of linear correlation plot between GSK591 mRNA-sequencing and PRO-sequencing.

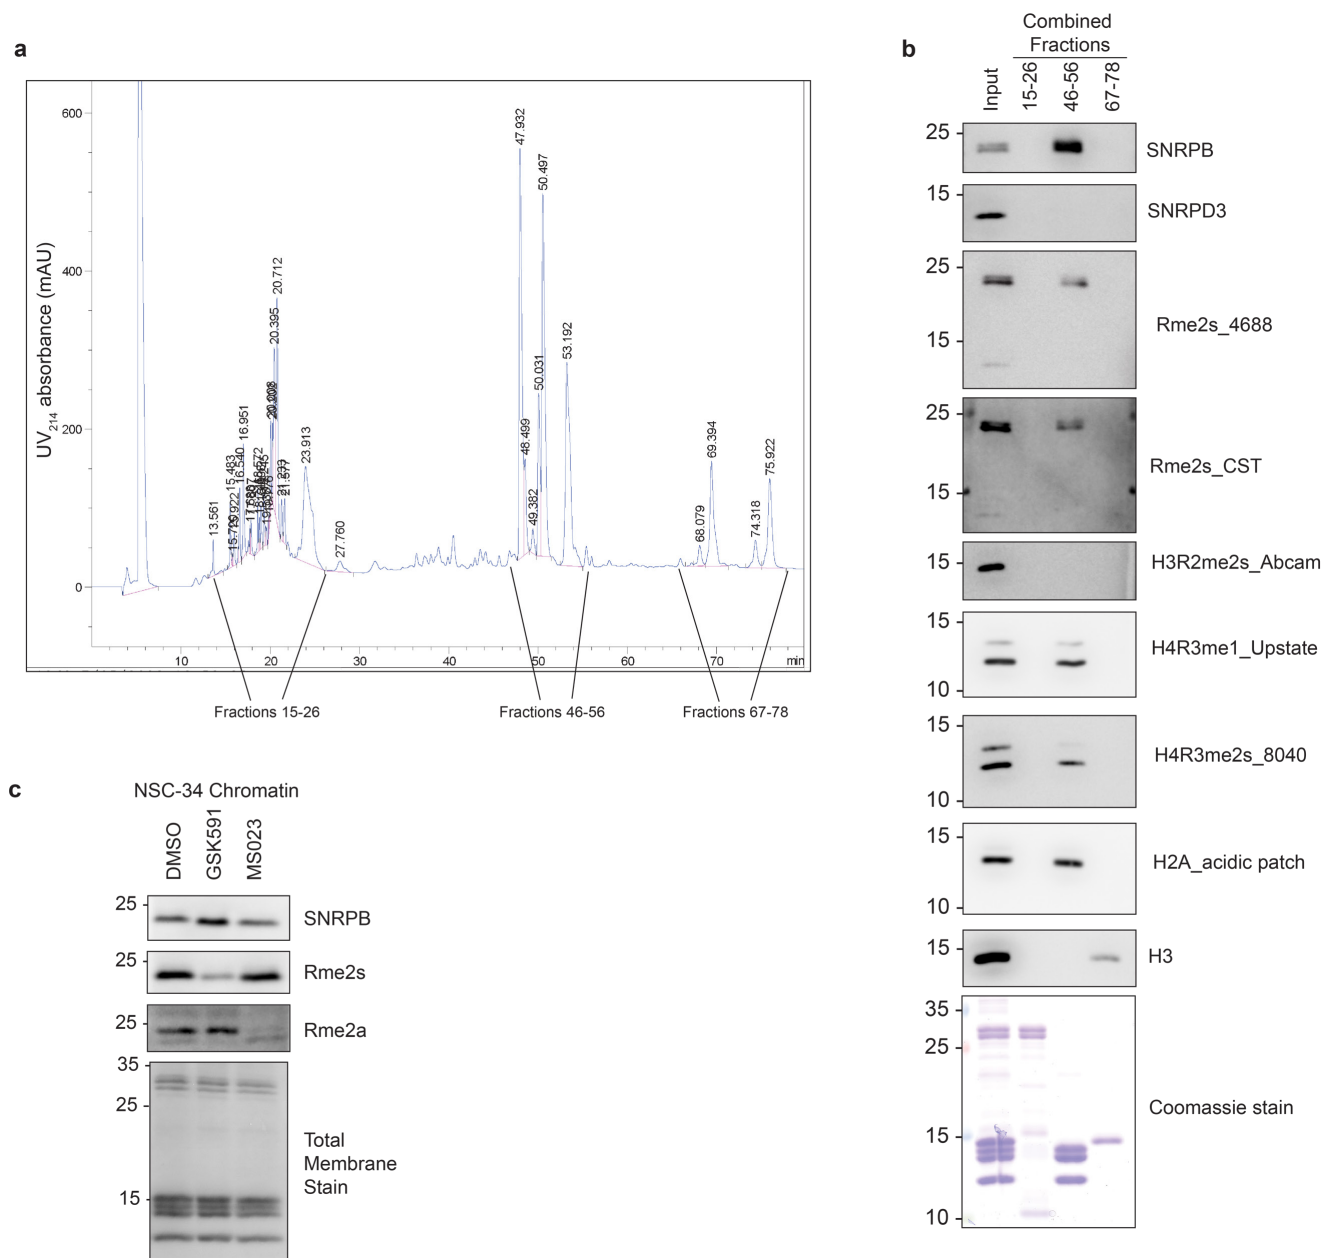

**Supplemental Figure S1 (Related to Figure 2). Sm proteins are a contaminant of acid extracted histones. a)** HPLC trace showing UV absorbance at 214nm for a run consisting of acid extracted chromatin. **b)** Western blot of combined fractions, analyzing presence of Sm proteins, histones, and selected histone PTMs. **c)** Immunoblot of chromatin fraction of NSC-34 cells following 2 day treatment of GSK591 or MS023.

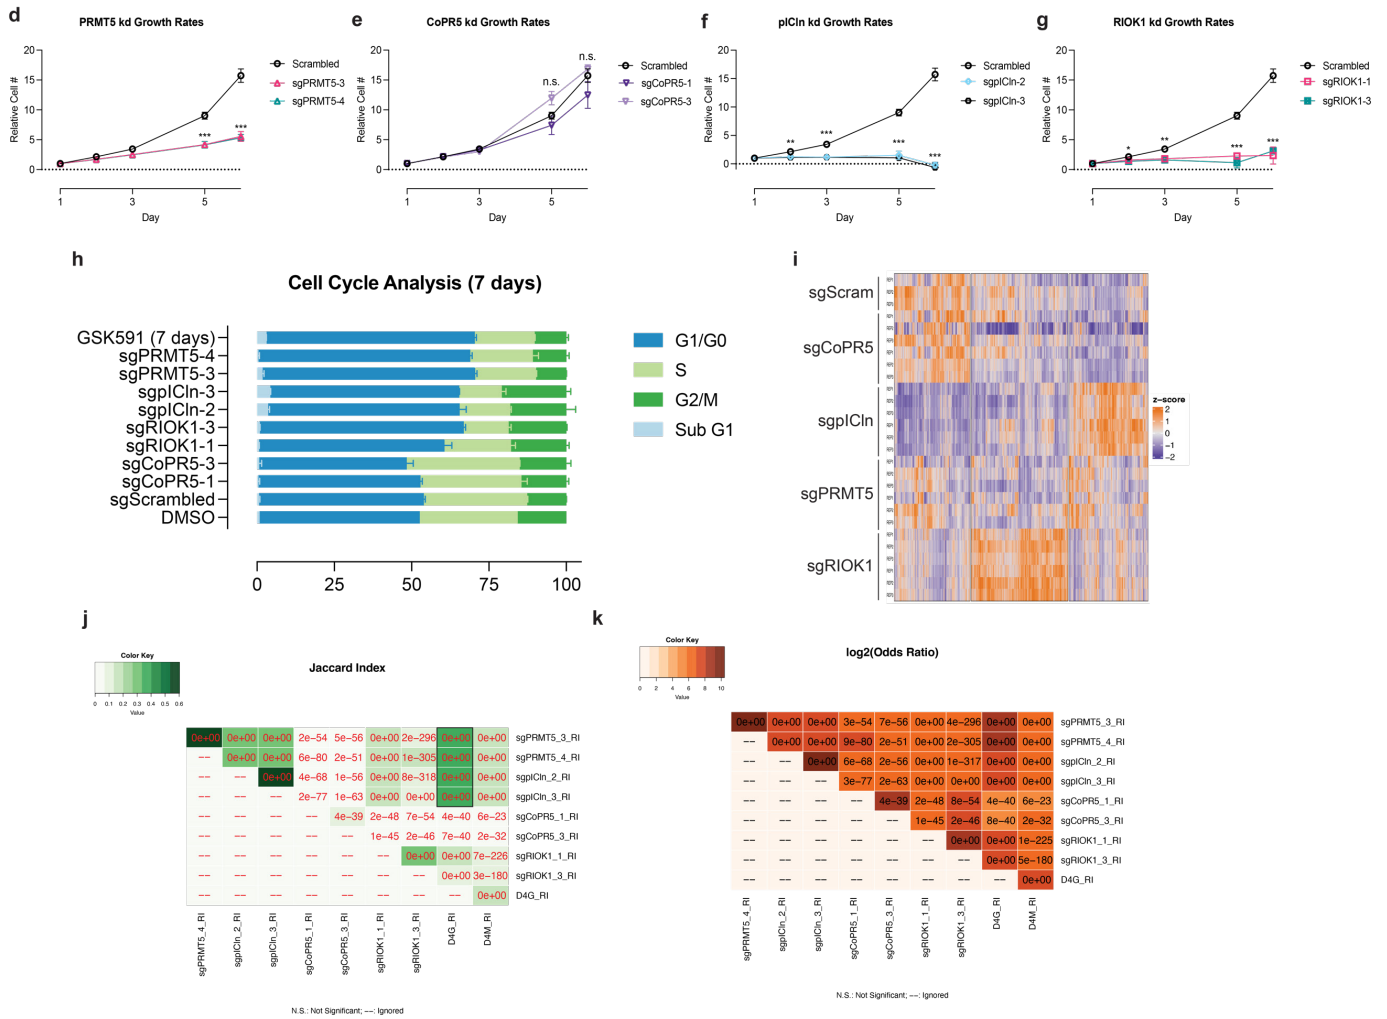

**Supplemental Figure S2 continued (Related to Figure 2). Characterization of PRMT5 and adaptor protein knockdown. d-g)** Growth curve of knockdown cell lines; \* $<0.01$ , \*\* $<0.01$ , \*\*\* $<0.001$ , n.s. = not significant **h)** Cell Cycle analysis of PRMT5 and adaptor knockdowns using propidium iodide (PI) staining cell cytometry. **i)** Z-score heatmap TPM counts from RNA sequencing of PRMT5 and adaptor knockdowns. **j)** Heatmap showing the Jaccard Index for the overlap of differentially retained introns for PRMT5 and adaptor protein knockdowns. The p-value of each overlap is shown in the rectangles. Color is proportional to the percentage of intron overlap (Jaccard Index). **k)** Heatmap showing the Odds Ratio for the overlap of the differentially retained introns for PRMT5 and adaptor protein knockdowns. The p-value of the overlap is shown in each rectangle. Rectangle color is proportional to  $\log_2(\text{Odds Ratio})$ .

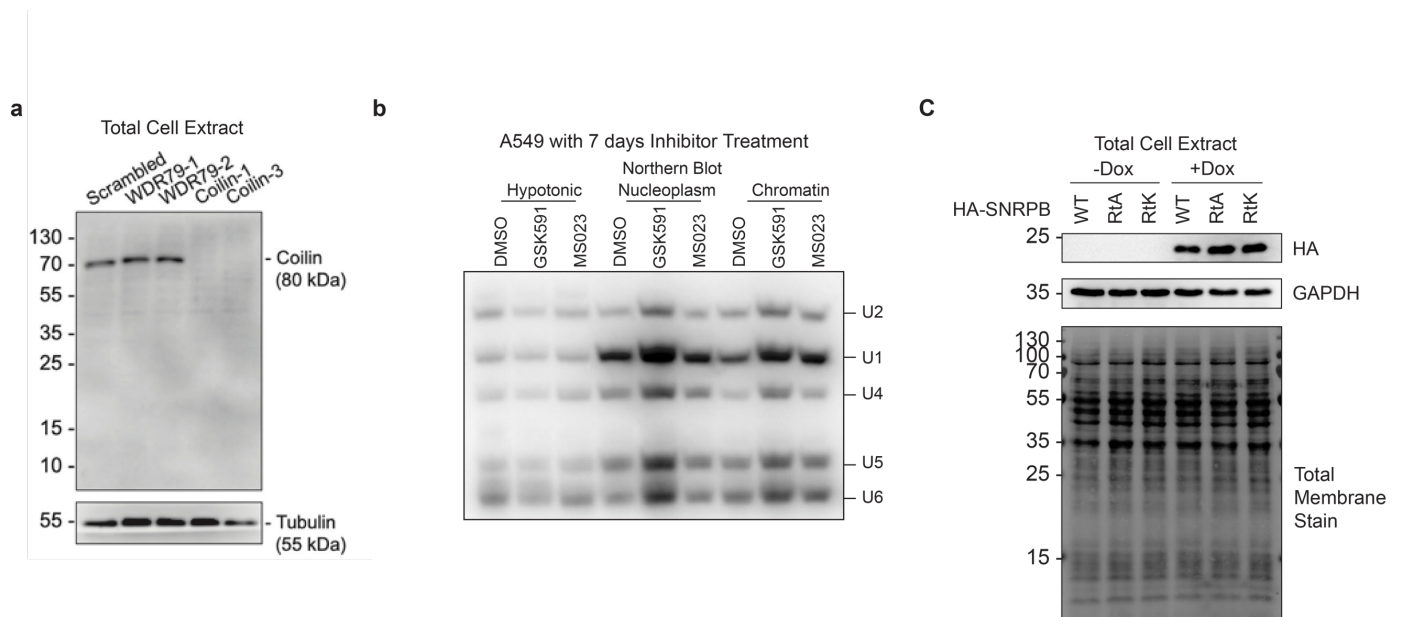

**Supplemental Figure S3 (Related to Figure 4).** **a**) Immunoblot controls of Coilin knockdown using CRISPRi in A549 cell. **b**) Northern blot testing snRNP abundance across cellular compartments after PRMT inhibition. **c**) Immunoblot of total cell lysate testing induction levels of mutant SNRNP proteins following four days of DOX (1 µg/mL) induction.

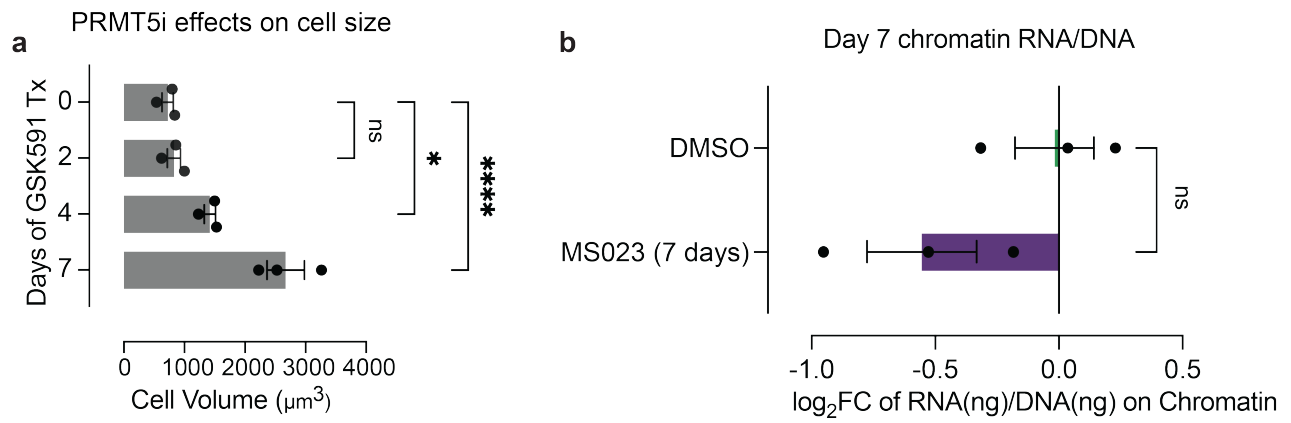

**Supplemental Figure S4 (Related to Figure 5).** **a** Histogram depicting cell volume as a function of PRMT5 inhibition over time. \* $p < 0.05$ , \*\*\*\* $p < 0.0001$  **b** Histogram of the log<sub>2</sub> fold change of total chromatin RNA to DNA following Type I PRMT inhibition with MS023.

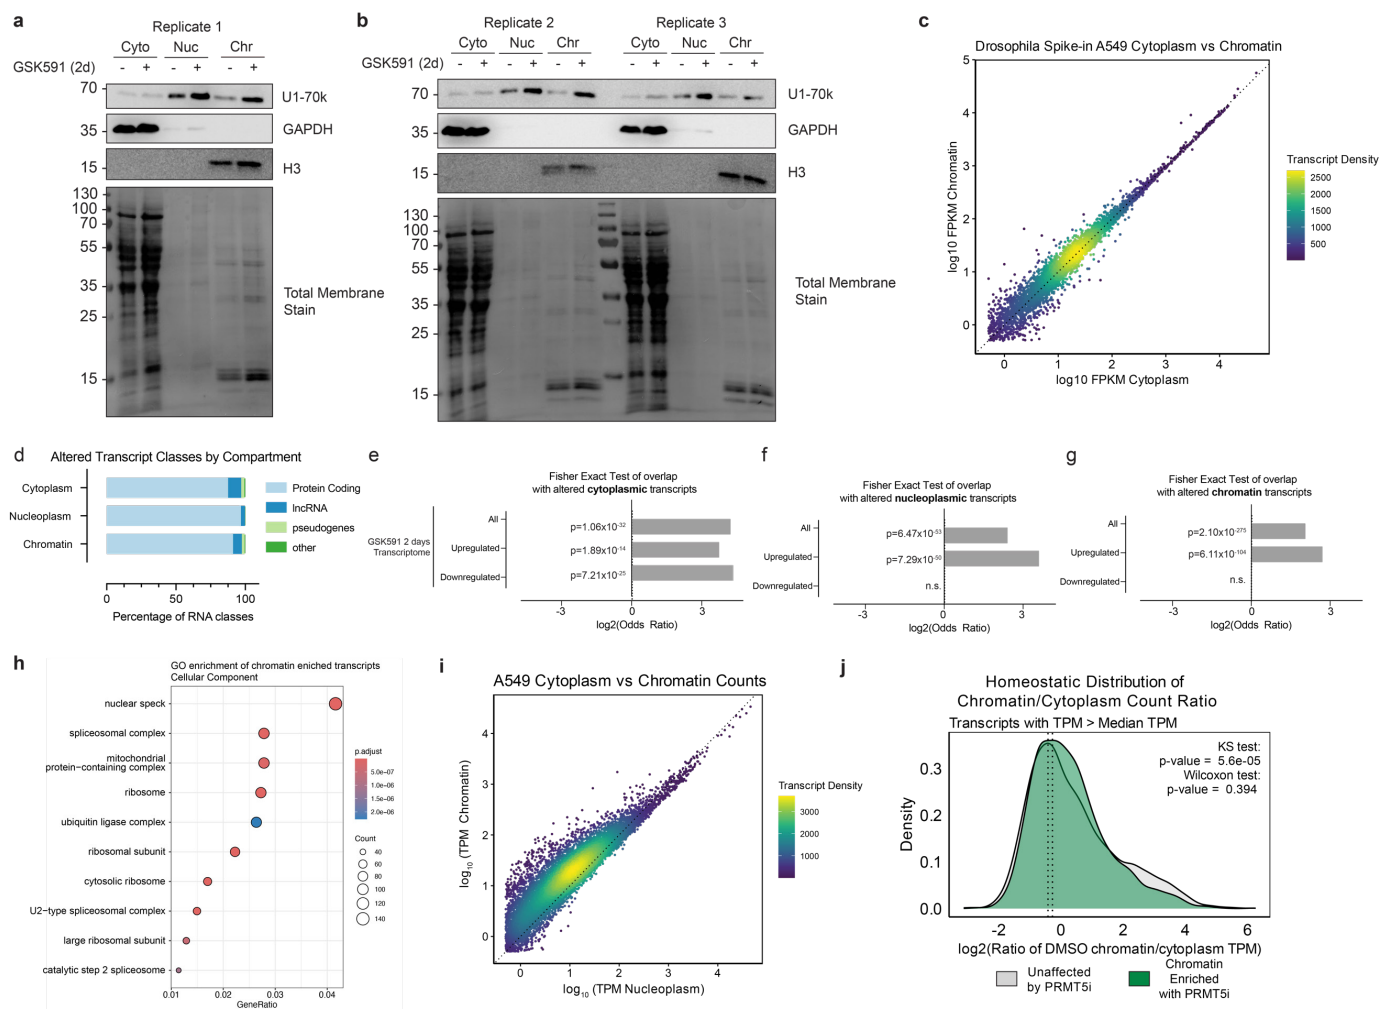

**Supplemental Figure S5 (Related to Figure 6).** **a-b)** Western blot controls of fractionated samples and replicates used for mRNA-sequencing. **c)** Correlation of the  $\log_{10}$  average normalized read counts in FPKM for *D. melanogaster* transcripts in the cytoplasm and chromatin compartments for untreated cells (DMSO). Dotted line represents  $y=x$ . Transcript color represents the density of points on the plot. **d)** Relative percentages of RNA classes of significantly altered transcripts ( $\text{padj} < 0.05$ ) between DMSO and GSK591 treated cellular compartments. **e-g)** Fisher exact tests of significantly altered transcripts in cellular compartment compared to gene sets from total GSK591 treated mRNA sequencing. **h)** Dot plot of cellular component gene ontology for chromatin-enriched transcripts. Dot size is representative to the number of genes per category and color represents the p-adjusted value. **i)** Correlation of the  $\log_{10}$  average normalized read counts in TPM for transcripts in the nucleoplasm and chromatin compartments for untreated cells (DMSO). **j)** Density plots of the ratio of normalized TPM counts per gene (with TPM > median of all expressed genes) between chromatin and cytoplasm compartments, comparing genes found to be enriched on chromatin upon PRMT5i. Kolmogorov-Smirnov and Wilcoxon ranked sum tests were used to compare distributions.

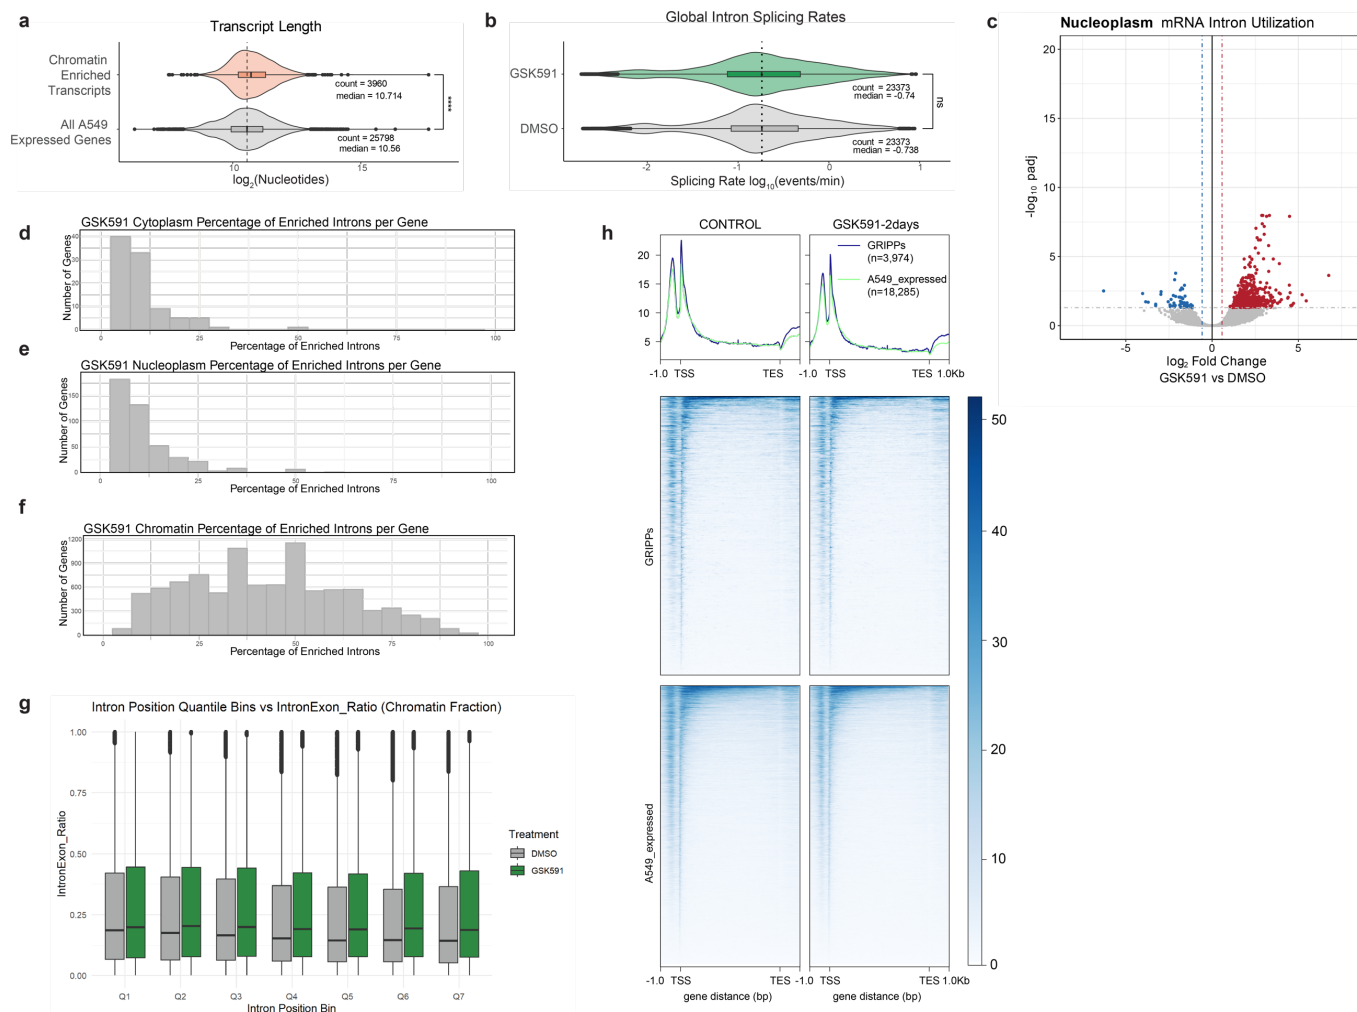

**Supplemental Figure S6 (Related to Figure 7).** **a**) Violin plots comparing transcript length of chromatin enriched genes upon PRMTi compared to all expressed genes in A549 cells. \*\*\*\*:  $p < 0.0001$  using Wilcoxon Ranked Sum test **b**) Splicing rates solved by SKaTER-seq comparing intron splicing rates solved both in GSK591 and DMSO treated conditions. Compared using Wilcoxon Ranked Sum test. **c**) Volcano plot of intron utilization for transcripts in nucleoplasm fraction comparing GSK591 vs DMSO. Red introns have a  $\log_2\text{FC} > 0.58$  and  $p_{\text{adj}} < 0.05$ . Blue introns have a  $\log_2\text{FC} < -0.58$  and a  $p_{\text{adj}} < 0.05$ . **d-f**) Histograms depicting the percentage of enriched introns and gene number in GSK591 treated fractions. **g**) Intron:Exon Ratio for DMSO vs GSK591 Chromatin fraction across 7 quantiles throughout the transcripts. **h**) Pro-seq metagene profiles comparing GRIPPs to all genes expressed in A549 cells.

**Supplemental Table S5.** Antibodies used in this study

| Antibody Target   | Vendor                   | Source            | Identifiers      | Additional Information |
|-------------------|--------------------------|-------------------|------------------|------------------------|
| SNRPB             | Proteintech              | Rabbit polyclonal | Cat#: 16807-1-AP | WB: 1:2,000            |
| SNRPD3            | Abcam                    | Rabbit polyclonal | Cat#: ab157118   | WB: 1:2,000            |
| H3K27me3          | CST                      | Rabbit monoclonal | Cat#: 9733       | WB: 1:100,000          |
| Rme2s             | Courtesy of Mark Bedford | Rabbit polyclonal | 4688             | WB: 1:10,000           |
| Rme2a             | Cell Signaling           | Rabbit monoclonal | Cat#: 8015S      | WB: 1:2,000            |
| Rme1              | Cell Signaling           | Rabbit monoclonal | Cat# 13522S      | WB: 1:2,000            |
| H3                | Abcam                    | Rabbit polyclonal | Cat#: 1791       | WB: 1:300,000          |
| PRMT5             | Millipore                | Rabbit polyclonal | Cat#: 07-405     | WB: 1:5,000            |
| MEP50             | LPBio                    | Rabbit polyclonal | Cat#: AR-0145-S  | WB: 1:5,000            |
| pICln             | Bethyl                   | Rabbit polyclonal | Cat#: A304-521A  | WB: 1:50,000           |
| RIOK1             | Proteintech              | Rabbit polyclonal | Cat#: 17222-1-AP | WB: 1:10,000           |
| GAPDH             | Abcam                    | Mouse monoclonal  | Cat#: ab9484     | WB: 1:50,000           |
| U1-snRNP 70 (E-4) | Santa Cruz               | Mouse monoclonal  | Cat#: SC390988   | WB: 1:2,000            |
| SNRPE             | Proteintech              | Rabbit polyclonal | Cat#: 20407-1-AP | WB:1:10,000            |
| IgG               | Abcam                    | Rabbit polyclonal | Cat#: ab46540    | IP: 5 ug               |
| m3G/TMG           | MBL Life Science         | Mouse monoclonal  | Cat#: RN019M     | IP: 5 ug               |
| Rme2s             | Cell Signaling           | Rabbit monoclonal | Cat#: 13222S     | WB: 1:2,000            |
| TBP               | Cell Signaling           | Rabbit polyclonal | Cat#: 8515       | WB: 1:10,000           |
| HA                | Cell Signaling           | Rabbit monoclonal | Cat#: C29F4      | WB: 1:100,000          |
| Coilin            | BD Biosciences           | Mouse monoclonal  | Cat#: 612074     | WB: 1:250              |
| Tubulin (E7)      | DSHB Iowa                | Mouse monoclonal  | Cat#: AB_2315513 | WB: 1:200              |



**Supplemental Table S6.** sgRNAs used in this study

| Target Gene       | Guide # | Sequence             |
|-------------------|---------|----------------------|
| Scrambled Control | 1       | GTGTAGTTCGACCATTCGTG |
| PRMT5             | 3       | GGTCCCTCCCGCTGGACACG |
| PRMT5             | 4       | GAGAAAGATGGCGGCGATGG |
| COPRS (CoPR5)     | 1       | GCCTGAAGGTCCATGCCCTG |
| COPRS (CoPR5)     | 3       | CATGGACCTTCAGGCCGCCG |
| CLNS1A (pICln)    | 2       | GCAGCAGAGTGCGGCAACAC |
| CLNS1A (pICln)    | 3       | GCTGTGCTCCAACTCCCTCA |
| RIOK1             | 1       | AACCATTCAGAAGCCAACAG |
| RIOK1             | 3       | TGGCAGGGTGGTGGATCTGT |
| Coilin            | 2       | GCCAGCTACCCCGCACTGTA |
| Coilin            | 4       | CAAGATGGCAGCTTCCGAGA |
